# Supplementary material for: Genetic Dissection of Sexual Reproduction in a Primary Homothallic Basidiomycete
Source: PubMed Central journal article supplement (PMC4915694; doi:10.1371/journal.pgen.1006110), 2016-06-21

# Sexual reproduction

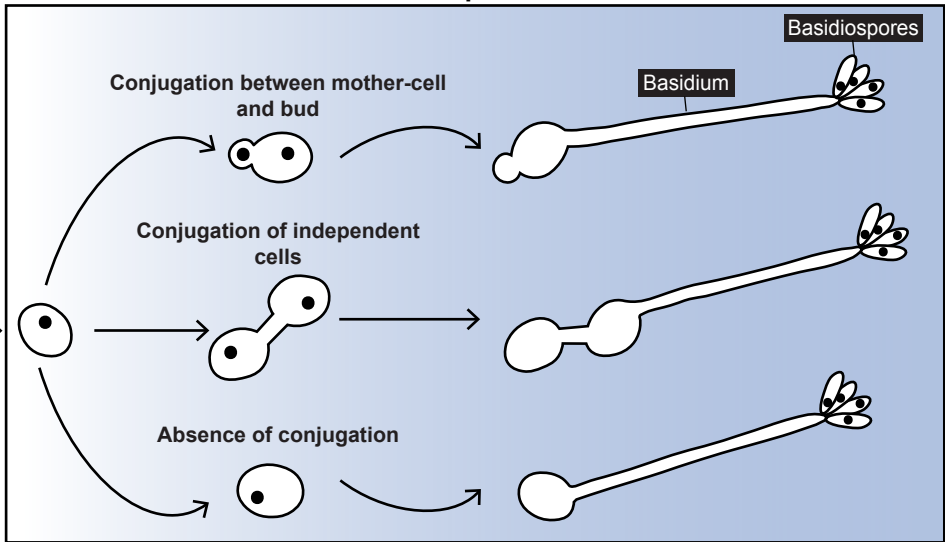

# Asexual reproduction

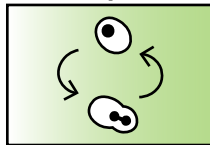

Supplement: pgen.1006110.s001.pdf [file pgen.1006110.s001.pdf]
