# Supplementary material for: Genetic Dissection of Sexual Reproduction in a Primary Homothallic Basidiomycete
Source: PubMed Central journal article supplement (PMC4915694; doi:10.1371/journal.pgen.1006110), 2016-06-21
Supplement: pgen.1006110.s004.pdf [file pgen.1006110.s004.pdf]

**A** Luria-Bertani media supplemented with: 100µg/ml ampicillin, 50µg/ml kanamycin, 0,5mM IPTG and 40µg/ml X-gal

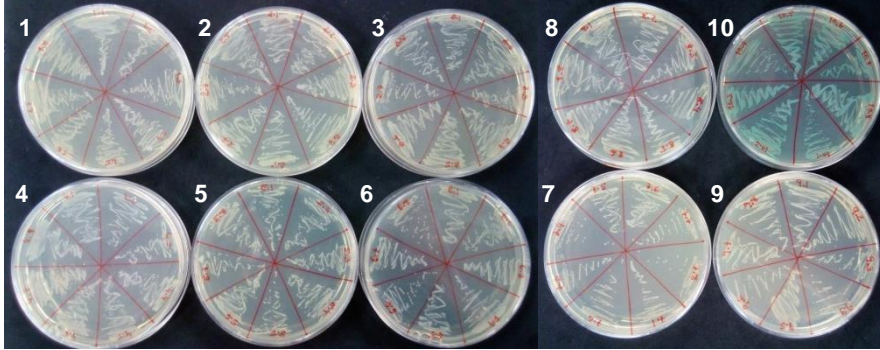

Plates after 24h at 30°C

**B** MacConkey media supplemented with: 1% Maltose, 100µg/ml ampicillin, 50µg/ml kanamycin and 0,5mM IPTG

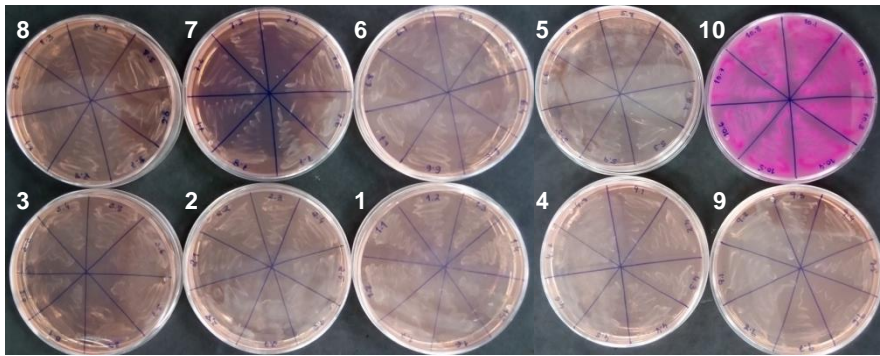

Plates after 24h at 30°C

**C**

| Plate number | Plasmids present in BTH101 E. coli      | Testing            |
|--------------|-----------------------------------------|--------------------|
| 1            | <i>pKNT25+HD1</i> and <i>pUT18+HD2</i>  | heterodimerization |
| 2            | <i>pKNT25+HD2</i> and <i>pUT18+HD1</i>  | heterodimerization |
| 3            | <i>pKNT25+HD1</i> and <i>pUT18+HD1</i>  | homodimerization   |
| 4            | <i>pKNT25+HD2</i> and <i>pUT18+HD2</i>  | homodimerization   |
| 5            | <i>pKNT25</i> and <i>pUT18</i>          | negative control   |
| 6            | <i>pKNT25+HD1</i> and <i>pUT18</i>      | negative control   |
| 7            | <i>pKNT25+HD2</i> and <i>pUT18</i>      | negative control   |
| 8            | <i>pKNT25</i> and <i>pUT18+HD1</i>      | negative control   |
| 9            | <i>pKNT25</i> and <i>pUT18+HD2</i>      | negative control   |
| 10           | <i>pKNT25-zip</i> and <i>pUT18C-zip</i> | positive control   |
