# Supplementary material for: Genetic Dissection of Sexual Reproduction in a Primary Homothallic Basidiomycete
Source: PubMed Central journal article supplement (PMC4915694; doi:10.1371/journal.pgen.1006110), 2016-06-21

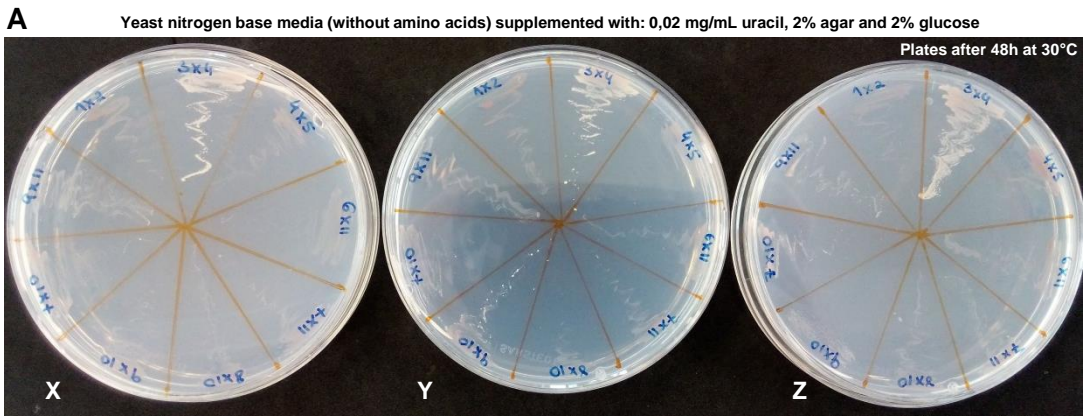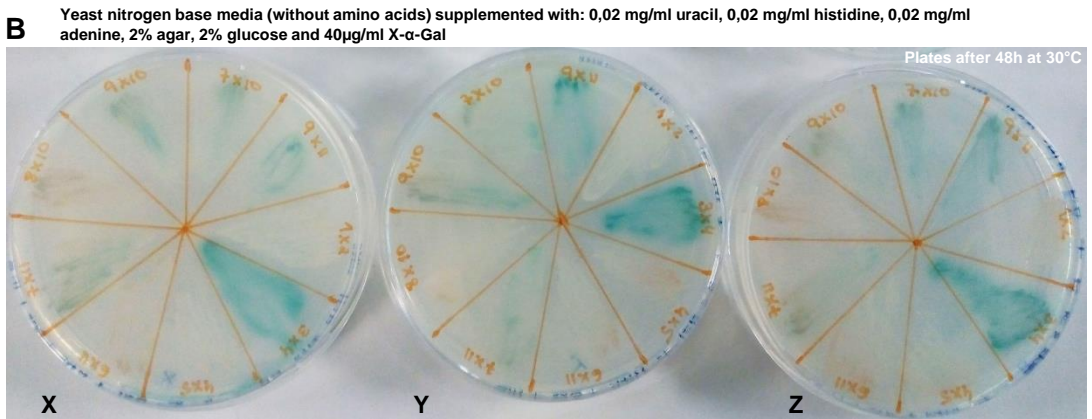

**C**

| Haploid id number | Plasmid in the haploid <i>S. cerevisiae</i> strain |
|-------------------|----------------------------------------------------|
| 1                 | pGBKT7 in Y2HGold cells                            |
| 2                 | pGADT7 in Y187 cells                               |
| 3                 | pGBKT7-53 in Y2HGold cells                         |
| 4                 | pGADT7-T in Y187 cells                             |
| 5                 | pGBKT7-Lam in Y2HGold cells                        |
| 6                 | pGBKT7+MP181/182 in Y2HGold cells                  |
| 7                 | pGBKT7+MP181/MP183 in Y2HGold cells                |
| 8                 | pGBKT7+MP184/MP185 in Y2HGold cells                |
| 9                 | pGBKT7+MP184/MP186 in Y2HGold cells                |
| 10                | pGADT7 +MP187/MP188 in Y187 cells                  |
| 11                | pGADT7 +MP189/MP190 in Y187 cells                  |

**D**

| Mating experiments using the haploid strains | Objective                              |
|----------------------------------------------|----------------------------------------|
| 1X2                                          | Negative control with empty plasmids   |
| 3X4                                          | Positive control for interaction       |
| 4X5                                          | Negative control for interaction       |
| 6X11                                         | Testing for heterodimerization hd1Xhd2 |
| 7X11                                         | Testing for heterodimerization HD1Xhd2 |
| 8X10                                         | Testing for heterodimerization hd2Xhd1 |
| 9X10                                         | Testing for heterodimerization HD2Xhd1 |
| 7X10                                         | Testing for homodimerization HD1Xhd1   |
| 9X11                                         | Testing for homodimerization HD2Xhd2   |

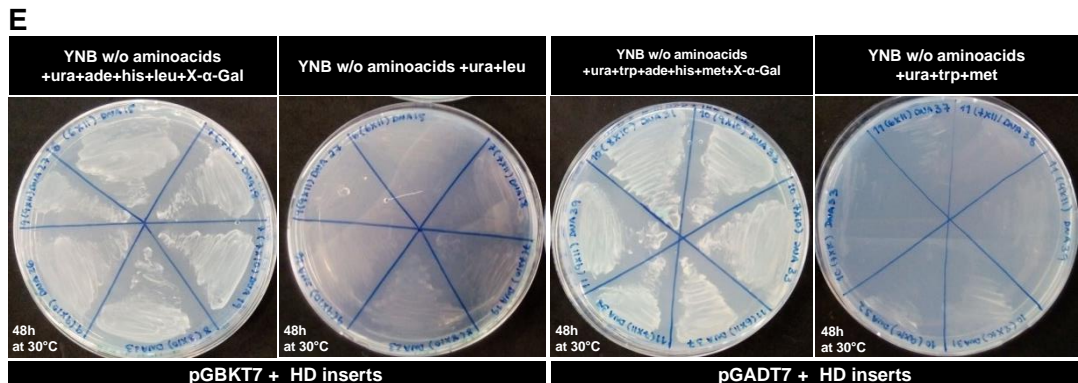

Supplement: pgen.1006110.s005.pdf [file pgen.1006110.s005.pdf]
