# Supplementary material for: Genetic Dissection of Sexual Reproduction in a Primary Homothallic Basidiomycete
Source: PubMed Central journal article supplement (PMC4915694; doi:10.1371/journal.pgen.1006110), 2016-06-21
Supplement: pgen.1006110.s007.pdf [file pgen.1006110.s007.pdf]

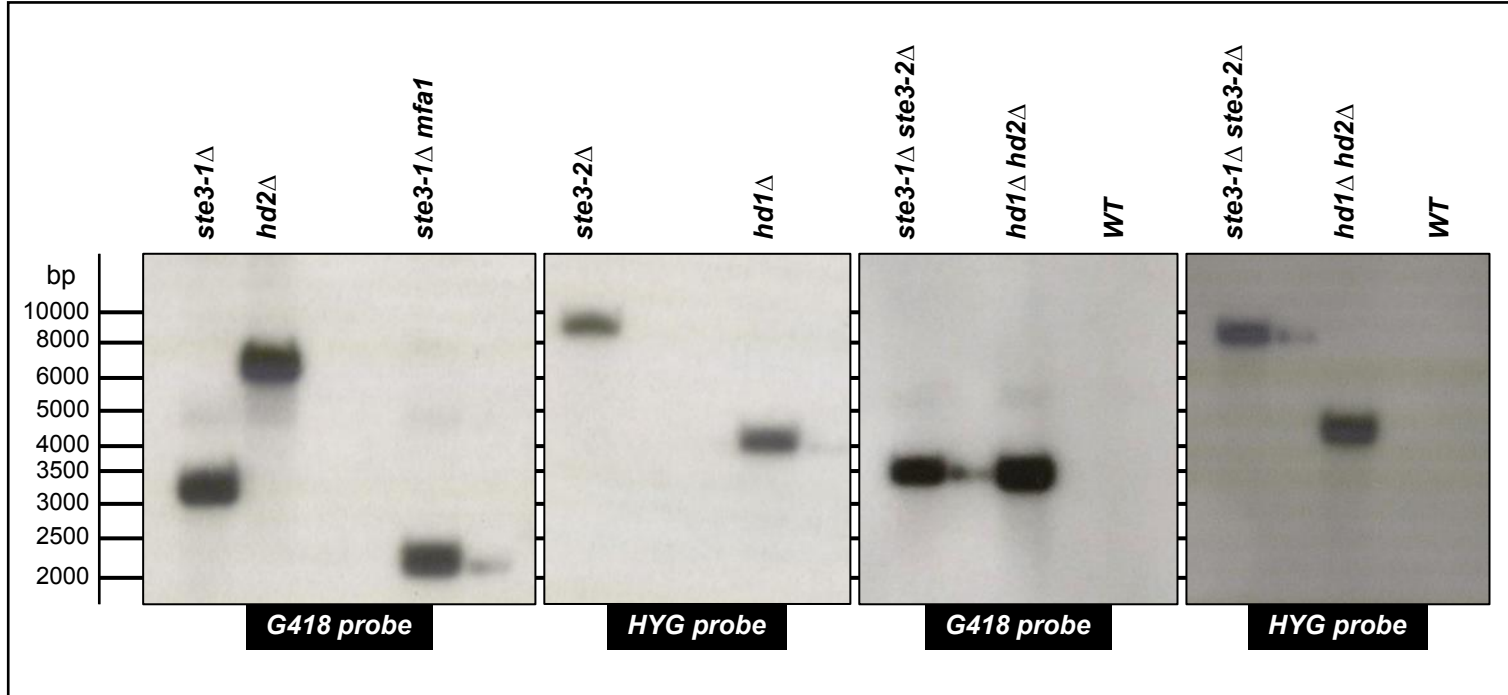

| Strains                | Relevant genotypes                | Expected fragment size / used probe      |
|------------------------|-----------------------------------|------------------------------------------|
| <i>ste3-1Δ</i>         | <i>ste3-1Δ::G418</i>              | 3196 bp / G418                           |
| <i>hd2Δ</i>            | <i>hd2Δ::G418</i>                 | 6651 bp / G418                           |
| <i>ste3-1Δ mfa1Δ</i>   | <i>ste3-1/mfa1Δ::G418</i>         | 2213 bp / G418                           |
| <i>ste3-2Δ</i>         | <i>ste3-2Δ::HYG</i>               | 8337 bp / HYG                            |
| <i>hd1Δ</i>            | <i>hd1Δ::HYG</i>                  | 4332 bp / HYG                            |
| <i>ste3-1Δ ste3-2Δ</i> | <i>ste3-2Δ::HYG/ste3-1Δ::G418</i> | 3196 bp / G418; 8337 bp / HYG            |
| <i>hd1Δ hd2Δ</i>       | <i>hd1Δ::HYG/hd2Δ::G418</i>       | 3189 bp / G418; 4332 bp / HYG            |
| WT (CBS 6938)          |                                   | No bands expected with any of the probes |
