# Supplementary material for: Genetic Dissection of Sexual Reproduction in a Primary Homothallic Basidiomycete
Source: PubMed Central journal article supplement (PMC4915694; doi:10.1371/journal.pgen.1006110), 2016-06-21
Supplement: pgen.1006110.s008.pdf [file pgen.1006110.s008.pdf]

**S1 Table.** Amino acid identity (%) between different alleles of pheromone receptors from selected basidiomycete species. Proteins were aligned using ClustalW as implemented in Bioedit (Hall, 1999).

| Species                              | Mating                   | Pheromone receptor gene | Accession number / Genome Locus (coordinates) | % aa identity                                               |
|--------------------------------------|--------------------------|-------------------------|-----------------------------------------------|-------------------------------------------------------------|
| <i>Phaffia rhodozyma</i> (CRUB 1149) | Homothallic              | <i>STE3-1</i>           | PRJNA307837/ NODE_186 (11928..13388)          | 49                                                          |
|                                      |                          | <i>STE3-2</i>           | PRJNA307837/ NODE_198( 2416..3807)            |                                                             |
| <i>Phaffia rhodozyma</i> (CBS 6938)  | Homothallic              | <i>STE3-1</i>           | CED85384.1                                    | 50                                                          |
|                                      |                          | <i>STE3-2</i>           | CED85379.1                                    |                                                             |
| <i>Phaffia rhodozyma</i> (CBS 7918)  | Homothallic              | <i>STE3-1</i>           | PRJNA306035/ LSVH01000226.1 (11858..13318)    | 50                                                          |
|                                      |                          | <i>STE3-2</i>           | PRJNA306035/ LSVH01000253.1 (7004..8395)      |                                                             |
| <i>Microbotryum violaceum</i>        | Heterothallic bipolar    | <i>A1</i>               | ABU62847.1                                    | 20                                                          |
|                                      |                          | <i>A2</i>               | ABU62846.1                                    |                                                             |
| <i>Ustilago hordei</i>               | Heterothallic bipolar    | <i>Pra1</i>             | CAJ41875.1                                    | 23                                                          |
|                                      |                          | <i>Pra2</i>             | AAD56044.1                                    |                                                             |
| <i>Cryptococcus flavescens</i>       | Heterothallic tetrapolar | <i>A2</i>               | CDR19322.1                                    | 29                                                          |
|                                      |                          | <i>A1</i>               | CDR19327.1                                    |                                                             |
| <i>Sporidiolobos salmonicolor</i>    | Heterothallic tetrapolar | <i>A2</i>               | ADM24775.1                                    | 26                                                          |
|                                      |                          | <i>A1</i>               | ADM24772.1                                    |                                                             |
| <i>Cryptococcus neoformans</i>       | Heterothallic bipolar    | <i>STE3 a</i>           | AAN75624.1                                    | 31                                                          |
|                                      |                          | <i>STE3 alpha</i>       | AAN75724.1                                    |                                                             |
| <i>Cryptococcus gattii</i>           | Heterothallic bipolar    | <i>STE3 a</i>           | AEG78597.1                                    | 31                                                          |
|                                      |                          | <i>STE3 alpha</i>       | AEG78622.1                                    |                                                             |
| <i>Sporisorium reilianum</i>         | Heterothallic tetrapolar | <i>Pra1</i>             | CAI59749.1                                    | Pra1 vs. Pra2: 23<br>Pra1 vs. Pra3: 28<br>Pra2 vs. Pra3: 24 |
|                                      |                          | <i>Pra2</i>             | CBQ71125.1                                    |                                                             |
|                                      |                          | <i>Pra3</i>             | ABW21687.1                                    |                                                             |
