# Supplementary material for: Genetic Dissection of Sexual Reproduction in a Primary Homothallic Basidiomycete
Source: PubMed Central journal article supplement (PMC4915694; doi:10.1371/journal.pgen.1006110), 2016-06-21
Supplement: pgen.1006110.s011.pdf [file pgen.1006110.s011.pdf]

**S4 Table.** List of plasmids and primers used in the Matchmaker® Gold Yeast Two-Hybrid System.

| Plasmids                                                              |                                                                                                                                                                                                         | Relevant features    |
|-----------------------------------------------------------------------|---------------------------------------------------------------------------------------------------------------------------------------------------------------------------------------------------------|----------------------|
| pGBKT7 DNA-BD                                                         | plasmid encoding the yeast Gal4 DNA-binding domain                                                                                                                                                      |                      |
| pGADT7 AD                                                             | plasmid encoding the yeast Gal4 activation domain                                                                                                                                                       |                      |
| pGBKT7-53                                                             | Plasmid use for positive control of protein interaction                                                                                                                                                 |                      |
| pGADT7-T                                                              | Plasmid use for positive control of protein interaction                                                                                                                                                 |                      |
| pGBKT7-Lam                                                            | Plasmid use for negative control of protein interaction                                                                                                                                                 |                      |
| pGBKT7+MP181-MP182                                                    | pGBKT7 plasmid containing HD1 gene (short version) <sup>1</sup> cloned in frame with the GAL4 DNA-BD                                                                                                    |                      |
| pGBKT7+MP181-MP183                                                    | pGBKT7 plasmid containing HD1 gene cloned in frame with the GAL4 DNA-BD                                                                                                                                 |                      |
| pGBKT7+MP184-MP185                                                    | pGBKT7 plasmid containing HD2 gene (short version) <sup>1</sup> cloned in frame with the GAL4 DNA-BD                                                                                                    |                      |
| pGBKT7+MP184-MP186                                                    | pGBKT7 plasmid containing HD2 gene cloned in frame with the GAL4 DNA-BD                                                                                                                                 |                      |
| pGADT7+MP187-MP188                                                    | pGADT7 plasmid containing HD1 gene (short version) <sup>1</sup> cloned in frame with the GAL4 activation domain                                                                                         |                      |
| pGADT7+MP189-MP190                                                    | pGADT7 plasmid containing HD2 gene (short version) <sup>1</sup> cloned in frame with the GAL4 activation domain                                                                                         |                      |
| Primers (5'-3')                                                       |                                                                                                                                                                                                         | Relevant information |
| MP181- CATCATGGAGGAGCAGAAGCTGATCTCAGAGGAGGACCTGATGGAACCGAGTCCGGCG     | Amplifies fragment comprising the complete N-terminal and homeodomain regions of the HD1 gene plus a tail of 40 bp at both 5 <sup>2</sup> and 3 <sup>3</sup> ends (complementary to the pGBKT7 plasmid) |                      |
| MP182- TCAAGACCCGTTTAGAGGCCCAAGGGGTTATGCTAGTTACATCCAGCCGCTGCGACG      |                                                                                                                                                                                                         |                      |
| MP183- TCAAGACCCGTTTAGAGGCCCAAGGGGTTATGCTAGTTATTAGCAGTCGAATACTTCGCC   | With MP181 primer, amplifies fragment comprising the complete HD1 gene plus a tail of 40 bp at both 5 <sup>2</sup> and 3 <sup>3</sup> ends (complementary to the pGBKT7 plasmid)                        |                      |
| MP184- CATCATGGAGGAGCAGAAGCTGATCTCAGAGGAGGACCTGATGTATAGCTTACCAAGTTGCC | Amplifies fragment comprising the complete N-terminal and homeodomain regions of the HD2 gene plus a tail of 40 bp at both 5 <sup>2</sup> and 3 <sup>3</sup> ends (complementary to the pGBKT7 plasmid) |                      |
| MP185- TCAAGACCCGTTTAGAGGCCCAAGGGGTTATGCTAGTTAAGAGCCCGATTACGGCG       |                                                                                                                                                                                                         |                      |
| MP186- TCAAGACCCGTTTAGAGGCCCAAGGGGTTATGCTAGTTATTATTCGCCGTTGTCATGTCAGG | With MP184 primer, amplifies fragment comprising the complete HD2 gene plus a tail of 40 bp at both 5 <sup>2</sup> and 3 <sup>3</sup> ends (complementary to the pGBKT7 plasmid)                        |                      |
| MP187- CGCCGCCATGGAGTACCCATACGACGTACCAGATTACGCTATGGAACCGAGTCCGGCG     | Amplifies fragment comprising the complete N-terminal and homeodomain regions of the HD1 gene plus a tail of 40 bp at both 5 <sup>4</sup> and 3 <sup>5</sup> ends (complementary to the pGADT7 plasmid) |                      |
| MP188- TTGAAGTGAACCTGCGGGTTTTTCAGTATCTACGATTCACATCCAGCCGCTGCGACG      |                                                                                                                                                                                                         |                      |
| MP189- CGCCGCCATGGAGTACCCATACGACGTACCAGATTACGCTATGTATAGCTTACCAAGTTGCC | Amplifies fragment comprising the complete N-terminal and homeodomain regions of the HD2 gene plus a tail of 40 bp at both 5 <sup>4</sup> and 3 <sup>5</sup> ends (complementary to the pGADT7 plasmid) |                      |
| MP190- TTGAAGTGAACCTGCGGGTTTTTCAGTATCTACGATTCAGAGCGCCGATTACGGCG       |                                                                                                                                                                                                         |                      |

<sup>1</sup> Short version of the genes HD1 and HD2 comprises the complete N-terminal region and homeodomain region of each of the genes (first 183 amino acids of HD1 and the first 196 amino acids of HD2).

<sup>2</sup> 5'-tail before MCS in pGBKT7 plasmid: CATCATGGAGGAGCAGAAGCTGATCTCAGAGGAGGACCTG

<sup>3</sup> 3'-tail after MCS in pGBKT7 p plasmid: TCAAGACCCGTTTAGAGGCCCAAGGGGTTATGCTAGTTA

<sup>4</sup> 5'-tail before MCS in pGADT7 plasmid: CGCCGCCATGGAGTACCCATACGACGTACCAGATTACGGCT

<sup>5</sup> 3'-tail after MCS in pGADT7 plasmid: TTGAAGTGAACCTGCGGGTTTTTCAGTATCTACGATTCA
