# Supplementary material for: Genetic Dissection of Sexual Reproduction in a Primary Homothallic Basidiomycete
Source: PubMed Central journal article supplement (PMC4915694; doi:10.1371/journal.pgen.1006110), 2016-06-21
Supplement: pgen.1006110.s013.pdf [file pgen.1006110.s013.pdf]

**S6 Table.** List of strains used in bacterial and yeast two hybrid assays.

| <b>Strains</b>                | <b>Relevant features</b>                                                                                                                                                                                                                                                                                                                                                            |
|-------------------------------|-------------------------------------------------------------------------------------------------------------------------------------------------------------------------------------------------------------------------------------------------------------------------------------------------------------------------------------------------------------------------------------|
| <i>DH5<math>\alpha</math></i> | <i>Escherichia coli</i> laboratory strain (Gibco-BRL, Carlsbad, CA, USA)                                                                                                                                                                                                                                                                                                            |
| <i>BTH101</i>                 | <i>Escherichia coli</i> reporter strain for BACTH (Bacterial Adenylate Cyclase Two-Hybrid System Kit) from EUROMEDEX (Cat. No. EUK001)                                                                                                                                                                                                                                              |
| <i>Y2HGold</i>                | <i>Saccharomyces cerevisiae</i> host strain for Matchmaker Gold Yeast Two-Hybrid System from Clontech (Cat. No. 630489); MAT $\alpha$ , <i>trp1-901</i> , <i>leu2-3, 112</i> , <i>ura3-52</i> , <i>his3-200</i> , <i>gal4<math>\Delta</math></i> , <i>gal80<math>\Delta</math></i> , LYS2 : : GAL1UAS–Gal1TATA–His3, GAL2UAS–Gal2TATA–Ade2, URA3 : : MEL1UAS–Mel1TATA, AUR1-C, MEL1 |
| <i>Y187</i>                   | <i>Saccharomyces cerevisiae</i> host strain for Matchmaker Gold Yeast Two-Hybrid System from Clontech (Cat. No. 630489); MAT $\alpha$ , <i>ura3-52</i> , <i>his3-200</i> , <i>ade2-101</i> , <i>trp1-901</i> , <i>leu2-3, 112</i> , <i>gal4<math>\Delta</math></i> , <i>gal80<math>\Delta</math></i> , <i>met–</i> , URA3 : : GAL1UAS–Gal1TATA–LacZ, MEL1                           |
