# Supplementary material for: Genetic Dissection of Sexual Reproduction in a Primary Homothallic Basidiomycete
Source: PubMed Central journal article supplement (PMC4915694; doi:10.1371/journal.pgen.1006110), 2016-06-21
Supplement: pgen.1006110.s014.pdf [file pgen.1006110.s014.pdf]

**S7 Table.** Primers and plasmids used for the construction of all gene deletion fragments except for gene STE3-2.

| Gene or region to knockout | Backbone plasmid | Primers use to construct gene deletion fragments                                           |                         |                                                                                                  |                         | Primers used for mutant confirmation                             |                         |                                                                                                                                                  |                         |                                                                                  |      |                                                                                |
|----------------------------|------------------|--------------------------------------------------------------------------------------------|-------------------------|--------------------------------------------------------------------------------------------------|-------------------------|------------------------------------------------------------------|-------------------------|--------------------------------------------------------------------------------------------------------------------------------------------------|-------------------------|----------------------------------------------------------------------------------|------|--------------------------------------------------------------------------------|
|                            |                  | Primers upstream from gene (5'-3')                                                         | Amplified fragment (bp) | Primers downstream from gene (5'-3')                                                             | Amplified fragment (bp) | Nested primers (5'-3')                                           | Amplified fragment (bp) | Primers (5'-3')                                                                                                                                  | Amplified fragment (bp) | Description                                                                      |      |                                                                                |
| <i>Ste3-1</i>              | pPR2TN           | MP066 (Kpn I) - GCGTCCGTTACCGATGGAATGAGAGAG<br>MP067 (EcoR I) - CTGGCGAATTCGTCTCTTTAAGTTC  | 848                     | MP064 (Not I) - AGTGACCGCCCGCATGATGCGCGCGACG<br>MP065 (Hind III) - GTTGCAGCTTCAATCTTAGCTGCGCTGG  | 1128                    | MP068 - GCGCTGGACAACACGGAGC<br>MP069 - CAGTTTTTCATCAATCCGAACGG   | 3869                    | MP029 - CGGTGGCGTCTGCTCGGAC<br>MP030 - ACTCTGATGGCGAAGCAACGGC                                                                                    | 836                     | Amplification of the <i>Ste3-1</i> gene (partial)                                |      |                                                                                |
|                            |                  |                                                                                            |                         |                                                                                                  |                         |                                                                  |                         | MP067 - CTGGCGAATTCGTCTCTTTAAGTTC<br>MP092 - TTCCACCATGATATTCGGCAAGCAGG                                                                          | 2220                    | Upstream flanking region of <i>Ste3-1</i> gene and partial resistance cassette   |      |                                                                                |
|                            |                  |                                                                                            |                         |                                                                                                  |                         |                                                                  |                         | MP091 - AAGATGGATTGCACGCGAGTTCTCC<br>MP065 - GTTGCAGCTTCAATCTTAGCTGCGCTGG                                                                        | 2500                    | Downstream flanking region of <i>Ste3-1</i> gene and partial resistance cassette |      |                                                                                |
| <i>Hd1</i>                 | pBS-HYG          | MP072 (Cla I) - AGATGATCGATTTTCTATCTGGTGC<br>MP073 (Kpn I) - ATGATGGTACCCTAAGCTGTAGTTTC    | 775                     | MP070 (Sac I) - CTGTCGAGCTCAAACCGCTCTCAACC<br>MP071 (Not I) - GGTTTCCGCGCCGTAGATTTCCCTTTTG       | 913                     | MP074 - AACGAAAGATGAAGACACCAG<br>MP075 - GTTTCACCAGAACATATCAGG   | 3508                    | MP083 - AAAACCTCTCCAAGCGCC<br>MP084 - TCTACATCGGTCTCTCC<br>MP154 - ATGAGATCGTTCAACAGC (paired withMP086)                                         | 1002 <sup>2580</sup>    | Amplification of the <i>Hd1</i> gene (partial)                                   |      |                                                                                |
|                            |                  |                                                                                            |                         |                                                                                                  |                         |                                                                  |                         | MP060 - GTGAAACCCGACGCCAGC<br>MP073 - ATGATGGTACCCTAAGCTGTAGTTTC                                                                                 | 1500                    | Upstream flanking region of <i>Hd1</i> gene and partial resistance cassette      |      |                                                                                |
|                            |                  |                                                                                            |                         |                                                                                                  |                         |                                                                  |                         | MP070 - CTGTCGAGCTCAAACCGCTCTCAACC<br>MP063 - TTTGCCCTCGGACGAGTGTGG                                                                              | 2932                    | Downstream flanking region of <i>Hd1</i> gene and partial resistance cassette    |      |                                                                                |
| <i>Hd2</i>                 | pPR2TN           | MP076 (EcoR I) - GATGGGAATTCCTTCTATCTGGTGCAC<br>MP073 (Kpn I) - ATGATGGTACCCTAAGCTGTAGTTTC | 774                     | MP077 (Not I) - GACGACCGCCCGCTAAACCTTGTGAG<br>MP078 (Hind III) - ACTCCAAGCTTCTCTATGTTGAGAG       | 629                     | MP079 - TTTCTATCTGGTGCACAACCTTC<br>MP080 - TATGGTTGAGAGTAATGAGC  | 3305                    | MP085 - TGTACAGTTTCAACGAAGC<br>MP086 - GTCTCCGTTCTTTCTCG<br>MP155 - ACATTTTCAATAGGCTGG (paired withMP085)                                        | 916 <sup>1595</sup>     | Amplification of the <i>Hd2</i> gene (partial)                                   |      |                                                                                |
|                            |                  |                                                                                            |                         |                                                                                                  |                         |                                                                  |                         | MP076 - GATGGGAATTCCTTCTATCTGGTGCAC<br>MP048 - GTACAGTCCGCAACCCGACCGC<br>MP037 - GCGTCCGTTGTGCGACTGTAC<br>MP078 - ACTCCAAGCTTCTCTATGTTGAGAG      | 2254                    | Upstream flanking region of <i>Hd2</i> gene and partial resistance cassette      |      |                                                                                |
|                            | pJET1.2+Zeo      | MP156 (Bsm I) - TTATTGAATGCTTCTATCTGGTGCAC<br>MP157 (Cla I) - AAAAATCGATCGTAAGCTGTAGTTTC   | 776                     | MP158 (Pst I) - TTATACTGCAGTCTCTATGTTGAGAGTAATGAGC<br>MP077 (Not I) - GACGACCGCCCGCTAAACCTTGTGAG | 630                     | MP079 - TTTCTATCTGGTGCACAACCTTC<br>MP080 - TATGGTTGAGAGTAATGAGC  | 3305                    | MP085 - TGTACAGTTTCAACGAAGC<br>MP086 - GTCTCCGTTCTTTCTCG                                                                                         | 916                     | Amplification of the <i>Hd2</i> gene (partial)                                   |      |                                                                                |
|                            |                  |                                                                                            |                         |                                                                                                  |                         |                                                                  |                         | MP049 - AGATAGAACCACACTCGC<br>MP114 - ATAAAAGATCTATGGCCAAGTTGACC<br>MP115 - ATAATCTAGATCAGTCTGCTCCTC<br>MP159 - TTATCTCGGTAACCTGCCCCG            | 1745                    | Upstream flanking region of <i>Hd2</i> gene and partial resistance cassette      |      |                                                                                |
| <i>Ste3-1/mfa1</i>         | pPR2TN           | MP087 (Kpn I) - TCATTGGTACCCTGTAAGTCTGCCTG<br>MP088 (EcoR I) - TCACCGAATTCACCTTGCAGCTTGC   | 1058                    | MP064 (Not I) - AGTGACCGCCCGCATGATGCGCGCGACG<br>MP065 (Hind III) - GTTGCAGCTTCAATCTTAGCTGCGCTGG  | 1126                    | MP068 - GCGCTGGACAACACGGAGC<br>MP089 - GCTTCATTATACATACCTCAGC    | 4591                    | MP029 - CGGTGGCGTCTGCTCGGAC<br>MP030 - ACTCTGATGGCGAAGCAACGGC                                                                                    | 836                     | Amplification of the <i>Ste3-1</i> gene (partial)                                |      |                                                                                |
|                            |                  |                                                                                            |                         |                                                                                                  |                         |                                                                  |                         | MP100 - TCCATCCTCAACTGATTGC<br>MP101 - AGTGTAAGAAGTCTCGG                                                                                         | 357                     | Amplification of the <i>Mfa1</i> (complete) region                               |      |                                                                                |
|                            |                  |                                                                                            |                         |                                                                                                  |                         |                                                                  |                         | MP091 - AAGATGGATTGCACGCGAGTTCTCC<br>MP065 - GTTGCAGCTTCAATCTTAGCTGCGCTGG                                                                        | 2500                    | Downstream flanking region of <i>Ste3-1</i> gene and partial resistance cassette |      |                                                                                |
| <i>Ste3-2/mfa2</i>         | pPR2TN           | MP093 (EcoR I) - TTTTCAATTCACCACTTCTCCCG<br>MP094 (Kpn I) - AGAATGGTACCCTGACGCGTTAGC       | 824                     | MP095 - AATATAACCGCCCGCTACCTGATACCTTG<br>MP096 - TTCTGAAGCTTAAAGTTCTGATTATCTAGAACCATCC           | 848                     | MP097 - CTCTACATAGAAGTGAATGGTCC<br>MP098 - GAGTCTTGTGTTGACGTAACC | 3224                    | MP092 - TTCCACCATGATATTCGGCAAGCAGG<br>MP088 - TCACCGAATTCACCTTGCAGCTTGC                                                                          | 2430                    | Downstream flanking region of <i>Mfa1</i> gene and partial resistance cassette   |      |                                                                                |
|                            |                  |                                                                                            |                         |                                                                                                  |                         |                                                                  |                         | MP035 - TTATGCATCAACCGCGTCTGGC<br>MP036 - GGACACAGAGGCAACRGTAGTTCC                                                                               | 929                     | Amplification of the <i>Ste3-2</i> gene (partial)                                |      |                                                                                |
|                            |                  |                                                                                            |                         |                                                                                                  |                         |                                                                  |                         | MP102 - TATATCATCTCTCGACCC<br>MP103 - TTCATCTTGCAGACAGC                                                                                          | 611                     | Amplification of the <i>Mfa2</i> (complete) region                               |      |                                                                                |
| <i>Spo11</i>               | pBS-HYG          | MP126 (Not I) - TATTTGCGGCGCGTGAATGTTTCAGG<br>MP127 (Sac I) - TATTTGAGCTCTGTTGTCAACCTATGCG | 732                     | MP124 (Kpn I) - TATTTGGTACCCTAAGGAACATGCG<br>MP125 (Cla I) - TTAATATCGATGTCATTTCCCGAAGC          | 565                     | MP128 - AAGGAAACATGCGGGACG<br>MP129 - GCTTTGTCAACCTATGCG         | 4000                    | MP091 - AAGATGGATTGCACGCGAGTTCTCC<br>MP099 - ACATGCTGTAGGCTTATCGATAGCG<br>MP093 - TTTCAAGATTCACCACTTCTCCCG<br>MP092 - TTCCACCATGATATTCGGCAAGCAGG | 2400                    | Downstream flanking region of <i>Ste3-2</i> gene and partial resistance cassette |      |                                                                                |
|                            |                  |                                                                                            |                         |                                                                                                  |                         |                                                                  |                         | MP130 - TTAATCTCATCTCTCGGC<br>MP131 - TGACTTGTCCAGTATCTCC                                                                                        | 2750                    | Amplification of the <i>Spo11</i> gene (partial)                                 |      |                                                                                |
|                            |                  |                                                                                            |                         |                                                                                                  |                         |                                                                  |                         | MP063 - TTTGCCCTCGGACGAGTGTGG<br>MP133 - TTGCCGAGGTTGGTGGATGG                                                                                    | 2293                    | Upstream flanking region of <i>Spo11</i> gene and partial resistance cassette    |      |                                                                                |
| <i>Mfa1</i>                | pJET1.2+Zeo      | MP171 (Pst I) - TTTTCTGCACTAGGTACATCACTCG<br>MP 172 (Not I) - TTTATCGGCGCTCTTACACTTTTGC    | 1165                    | MP173 (Cla I) - ATTTTATCGATAGGCAATCAGTTGAGG<br>MP174 (Pme I) - TATTATTTAAACATAAGGCAGTGCAGC       | 1024                    | MP175 - ACATCACTCGGTACAGATCC<br>MP176 - ATAAGGCAGTGCAGGAGG       | 3363                    | MP132 - TCGTTCCTCAGCCCTAAGACATGC<br>MP060 - GTGAAACCCGACGCCACG                                                                                   | 1344                    | Downstream flanking region of <i>Spo11</i> gene and partial resistance cassette  |      |                                                                                |
|                            |                  |                                                                                            |                         |                                                                                                  |                         |                                                                  |                         | MP100 - TCCATCCTCAACTGATTGC<br>MP101 - AGTGTAAGAAGTCTCGG                                                                                         | 357                     | Amplification of the <i>Mfa1</i> (complete) region                               |      |                                                                                |
|                            |                  |                                                                                            |                         |                                                                                                  |                         |                                                                  |                         | MP171 - TTTTCTGCACTAGGTACATCACTCG<br>MP115 - ATAATCTAGATCAGTCTGCTCCTC                                                                            | 1937                    | Downstream flanking region of <i>Mfa1</i> gene and partial resistance cassette   |      |                                                                                |
| <i>Mfa2</i>                | pJET1.2+Zeo      | MP162 (Pst I) - TTTTCTGCACTAGGTACATCACTCG<br>MP163 (Not I) - TTTTCTGCGCGCTCTTACACTTTTGC    | 998                     | MP166 (Cla I) - TTTTATCGATGATATACGAGATCACC<br>MP167 (Bsm I) - TTTTGAATGCAGAACGACTGGAAGAG         | 1014                    | MP168 - ATCAGAGGAGTACGATCG<br>MP170 - AGAACGACTGGAAGAGC          | 3193                    | MP114 - ATAAAAGATCTATGGCCAAGTTGACC<br>MP174 - TATTAGTTTAAACATAAGGCAGTGCAGC                                                                       | 1794                    | Upstream flanking region of <i>Mfa1</i> gene and partial resistance cassette     |      |                                                                                |
|                            |                  |                                                                                            |                         |                                                                                                  |                         |                                                                  |                         | MP102 - TATATCATCTCTCGACCC<br>MP103 - TTCATCTTGCAGACAGC                                                                                          | 611                     | Amplification of the <i>Mfa2</i> (complete) region                               |      |                                                                                |
|                            |                  |                                                                                            |                         |                                                                                                  |                         |                                                                  |                         | MP162 - TTTTCTGCACTAGGTACATCACTCG<br>MP115 - ATAATCTAGATCAGTCTGCTCCTC                                                                            | 1770                    | Upstream flanking region of <i>Mfa2</i> gene and partial resistance cassette     |      |                                                                                |
|                            |                  |                                                                                            |                         |                                                                                                  |                         |                                                                  |                         |                                                                                                                                                  |                         | MP114 - ATAAAAGATCTATGGCCAAGTTGACC<br>MP167 - TTTTGAATGCAGAACGACTGGAAGAG         | 1784 | Downstream flanking region of <i>Mfa2</i> gene and partial resistance cassette |
