# Supplementary material for: Genetic Dissection of Sexual Reproduction in a Primary Homothallic Basidiomycete
Source: PubMed Central journal article supplement (PMC4915694; doi:10.1371/journal.pgen.1006110), 2016-06-21
Supplement: pgen.1006110.s015.pdf [file pgen.1006110.s015.pdf]

**S8 Table.** Primers and plasmid used for the construction of the STE3-2 deletion fragment by overlap extension PCR.

| Gene or region to knockout | Plasmid                             | Primers upstream from gene (5'-3')                                                                                                                                | Amplified fragment (bp) | Primers for HYG resistance cassette (5'-3')                                                                                                                                                                     | Amplified fragment (bp) | Primers downstream from gene (5'-3')                                                                                                                               | Amplified fragment (bp) | Nested primers (5'-3')                                           | Amplified fragment (bp) | Primers (5'-3') used for mutant confirmation and amplification description                                                                          | Amplified fragment (bp) |
|----------------------------|-------------------------------------|-------------------------------------------------------------------------------------------------------------------------------------------------------------------|-------------------------|-----------------------------------------------------------------------------------------------------------------------------------------------------------------------------------------------------------------|-------------------------|--------------------------------------------------------------------------------------------------------------------------------------------------------------------|-------------------------|------------------------------------------------------------------|-------------------------|-----------------------------------------------------------------------------------------------------------------------------------------------------|-------------------------|
| Ste3-2                     | pJet1.2 resistance cassette storage | MP039 - TGTCAGGGCAAAAAGAGAAAAACAAGGGG<br>MP040 - AAGAGCTTGTGTCGGATGAACTGTCGGCTGA<br>TGAGCCGATGATCAGAGGAGTACGATCGAAAGAGAAGAT<br><br>(Amplified from CBS 6938 gDNA) | 1165                    | MP041 - TCGATATAATCTTCTTTTCGATCGTACTCCTC<br>TGATCATCGGCTCATCAGCCGACAGTTTCATCCGAC<br>MP042 - TATACTACAACATTACCGAAGGTATCAAGGTATC<br>AGGGTAATCATGAGAGATGACGGAGATGATGGTGATG<br><br>(Amplified from pBS-HYG plasmid) | 1899                    | MP043 - TCTGTTGACCATCACCATCATCTCCGTCATCTCT<br>CATGATTACCCTGATACCTTGATACCTTCGGTAATG<br>MP044 - AACGAGCAAGGAGACAAACAACAGGTCGAG<br><br>(Amplified from CBS 6938 gDNA) | 609                     | MP045 - GAGAAAAACAAGGGGAGATTTGGG<br>MP046 - ACAGGTCGAGGCAGCAAGGG | 3480                    | MP035 - TTATGCATCAACCGCGTCTGGC<br>MP036 - GGACACAGAGGCAACRGTAGTTCC<br>(Amplification of the Ste3-2 gene (partial))                                  | 929                     |
|                            |                                     |                                                                                                                                                                   |                         |                                                                                                                                                                                                                 |                         |                                                                                                                                                                    |                         |                                                                  |                         | MP060 - GTGGAACCGACGCCAGC<br>MP061 - GAGGGCTGTTGACGATAGGG<br>(Downstream flanking region of Ste3-2 gene and partial resistance cassette)            | 1156                    |
|                            |                                     |                                                                                                                                                                   |                         |                                                                                                                                                                                                                 |                         |                                                                                                                                                                    |                         |                                                                  |                         | MP063 - TTTGCCCTCGACGAGTGCTGG<br>MP039 - TGTCAGGGCAAAAAGAGAAAAACAAGGGG<br>(Upstream flanking region of Ste3-2 gene and partial resistance cassette) | 2542                    |
