# Supplementary material for: Genetic Dissection of Sexual Reproduction in a Primary Homothallic Basidiomycete
Source: PubMed Central journal article supplement (PMC4915694; doi:10.1371/journal.pgen.1006110), 2016-06-21
Supplement: pgen.1006110.s016.pdf [file pgen.1006110.s016.pdf]

**S9 Table.** Primers and plasmid used for the construction of the Zeocin resistance cassette.

| Resistance cassette | Backbone Plasmid | Primers for promoter ( <i>Ptef</i> ) (5'-3')                                                                                   | Amplified fragment (bp) | Primers for <i>Sh ble</i> gene (5'-3')                                                                                                              | Amplified fragment (bp) | Primers for terminator ( <i>Tgpd</i> ) (5'-3')                                                                                 | Amplified fragment (bp) | Nested primers (5'-3')                                                   | Amplified fragment (bp) | Other information                                                          |
|---------------------|------------------|--------------------------------------------------------------------------------------------------------------------------------|-------------------------|-----------------------------------------------------------------------------------------------------------------------------------------------------|-------------------------|--------------------------------------------------------------------------------------------------------------------------------|-------------------------|--------------------------------------------------------------------------|-------------------------|----------------------------------------------------------------------------|
| Zeocin              | pJET1.2          | MP112 (Not I) - ATAATCGGGCCGCATCGGCTCATCAGC<br>MP113 (Bgl II) - ATGCGAGATCTGGTGAAGCTGTTTCGAG<br>(Amplified from CBS 6938 gDNA) | 398                     | MP114 (Bgl II) - ATAAAAGATCTATGGCCAAGTTGACC<br>MP115 (Xba I) - ATAATTCTAGATCAGTCCTGCTCCTC<br>(Amplified from pcDNA-3.1/ZEO plasmid from Invitrogen) | 374                     | MP116 (Xba I) - ATAATTCTAGAGGCCTACGGTTCTCTCC<br>MP117 (Cla I) - GACTGATCGATATCATGAGAGATGACGG<br>(Amplified from CBS 6938 gDNA) | 396                     | MP118 - ATCGGCTCATCAGCCGACAGTTCATC<br>MP119 - ATCATGAGAGATGACGGAGATGATGG | 1175                    | Primers MP118/MP119 were used to sequence the complete resistance cassette |
