# Supplementary material for: Genetic Dissection of Sexual Reproduction in a Primary Homothallic Basidiomycete
Source: PubMed Central journal article supplement (PMC4915694; doi:10.1371/journal.pgen.1006110), 2016-06-21
Supplement: pgen.1006110.s017.pdf [file pgen.1006110.s017.pdf]

**S10 Table.** Primers and plasmid used for the construction of the complementation constructs.

| Complemented gene | Backbone Plasmid | Primers (5'-3')                                                                                           | Amplified fragment (bp) | Description of amplified region                            | complementation plasmid    | Linearization of complementation plasmid | Mutant strain transformed with complementation plasmid | Primers used for mutant confirmation (5'-3')                    | Amplified fragment (bp) | Description                                        |
|-------------------|------------------|-----------------------------------------------------------------------------------------------------------|-------------------------|------------------------------------------------------------|----------------------------|------------------------------------------|--------------------------------------------------------|-----------------------------------------------------------------|-------------------------|----------------------------------------------------|
| <i>MFA2</i>       | pUC18+rDNA+ZEO   | MP134 (Pst I) - ATTATCTGCAGACCTCGAGACCCAGCTCCG<br>MP135 (BamH I) - ATTATGGATCCAGTGGTCGCCAAAGCTGACG        | 1122                    | MFA gene plus 500bp upstream and downstream of the gene    | pUC18+rDNA+ZEO+MP134/MP135 | Restriction enzyme Cla I                 | CBS 6938_ste3-2/mfa2Δ                                  | MP102 - TATATCATCTCTCGACCC<br>MP103 - TTCATCTTGTCAGACAGC        | 611                     | Amplification of the <i>MFA2</i> (complete) region |
| <i>STE3-1</i>     | pUC18+rDNA+ZEO   | MP136 (Pst I) - TATTA <u>CTGCA</u> GTGTATCTCAAGTCTTGCC<br>MP137 (BamH I) - TATTAGGATCCTTTCCGAGATTGATGGTCG | 1994                    | STE3-1 gene plus 300bp upstream and downstream of the gene | pUC18+rDNA+ZEO+MP136/MP137 |                                          | CBS 6938_ste3-1/ste3-2Δ                                | MP029 - CGGTGGGCGTTCTGGTCGGAC<br>MP030 - ACTCTGATGGCGAAGCAACGGC | 836                     | Amplification of the <i>STE3-1</i> gene (partial)  |
| <i>HD1</i>        | pUC18+rDNA+ZEO   | MP138 (Pst I) - AAAA <u>CTGCAG</u> GAAAGATAGTAAACTGG<br>MP139 (BamH I) - AATTTGGATCCTTTCATCGGGCTCAAGC     | 2459                    | HD1 gene plus 300bp upstream and downstream of the gene    | pUC18+rDNA+ZEO+MP138/MP139 |                                          | CBS 6938_hd1/hd2Δ                                      | MP083 - AAAACCTCTCCAAGCGCC<br>MP084 - TCTACATCGGTCTCTTCC        | 1002                    | Amplification of the <i>HD1</i> gene (partial)     |
|                   |                  |                                                                                                           |                         |                                                            |                            |                                          | CBS 6938_hd1Δ                                          | MP083 - AAAACCTCTCCAAGCGCC<br>MP084 - TCTACATCGGTCTCTTCC        | 1002                    | Amplification of the <i>HD1</i> gene (partial)     |
