# Supplementary material for: Genetic Dissection of Sexual Reproduction in a Primary Homothallic Basidiomycete
Source: PubMed Central journal article supplement (PMC4915694; doi:10.1371/journal.pgen.1006110), 2016-06-21
Supplement: pgen.1006110.s018.pdf [file pgen.1006110.s018.pdf]

**S11 Table.** List of plasmids and primers used in the Bacterial Adenylate Cyclase Two-Hybrid System.

| Plasmids                                       | Relevant features                                                                                                                                                                                                                                                                                                                                                                                                   |
|------------------------------------------------|---------------------------------------------------------------------------------------------------------------------------------------------------------------------------------------------------------------------------------------------------------------------------------------------------------------------------------------------------------------------------------------------------------------------|
| pUT18                                          | High copy number vector that encodes the T18 fragment that is fused downstream of the MCS. This vector allows creating in-frame fusions at the N-terminal end of T18. BACTH System Kit from EUROMEDEX                                                                                                                                                                                                               |
| pKNT25                                         | Low copy number vector that encodes the T25 fragment that is fused in frame downstream from a MCS. This allows creating in-frame fusions at the N-terminal end of T25. BACTH System Kit from EUROMEDEX                                                                                                                                                                                                              |
| pUT18C-ZIP                                     | The plasmids pKT25-zip and pUT18C-zip serve as positive controls for complementation in the BACTH System Kit from EUROMEDEX. When pKT25-zip and pUT18C-zip are co-transformed into BTH101 E. coli cells, they restore a Cya+ phenotype. Vector pKT25-zip has a leucine zipper genetically fused in frame to the T25 fragment, while pUT18C-zip has a leucine zipper genetically fused in frame to the T18 fragment. |
| pKNT25-ZIP                                     |                                                                                                                                                                                                                                                                                                                                                                                                                     |
| pEX-K4-HD1                                     | Eurofins in-house standard vector with HD1 synthetic gene                                                                                                                                                                                                                                                                                                                                                           |
| pEX-K4-HD2                                     | Eurofins in-house standard vector with HD2 synthetic gene                                                                                                                                                                                                                                                                                                                                                           |
| pKNT25+HD1                                     | Plasmid with a HD1 in frame fusion at the N-terminal end of T25 subunit                                                                                                                                                                                                                                                                                                                                             |
| pKNT25+HD2                                     | Plasmid with a HD2 in frame fusion at the N-terminal end of T25 subunit                                                                                                                                                                                                                                                                                                                                             |
| pUT18+HD1                                      | Plasmid with a HD1 in frame fusion at the N-terminal end of T18 subunit                                                                                                                                                                                                                                                                                                                                             |
| pUT18+HD2                                      | Plasmid with a HD2 in frame fusion at the N-terminal end of T18 subunit                                                                                                                                                                                                                                                                                                                                             |
| Primers (5'-3')                                | Relevant information                                                                                                                                                                                                                                                                                                                                                                                                |
| MP177(Hind III) - ACGCCAAGCTTGATGGAACCGAGTCCG  | MP177-MP178 amplify a 1543 bp fragment containing HD1 synthesized gene present on plasmid pEX-K4-HD1, with restriction sites for Hind III and Pst I in the fragment extremities                                                                                                                                                                                                                                     |
| MP178 (Pst I) - TCGACCTGCAGGCGCAGTCGAATACTTC   |                                                                                                                                                                                                                                                                                                                                                                                                                     |
| MP179 (Hind III) - ACGCCAAGCTTGATGTATAGCTTCACC | MP179-MP180 amplify a 1261 bp fragment containing HD2 synthesized gene present on plasmid pEX-K4-HD2, with restriction sites for Hind III and Pst I in the fragment extremities.                                                                                                                                                                                                                                    |
| MP180 (Pst I) - TCGACCTGCAGGCTTCCCGTTGTCATG    |                                                                                                                                                                                                                                                                                                                                                                                                                     |
| MP191 - ACACTTTATGCTTCCGGC                     | Allow the amplification and sequencing of the constructions performed in plasmid pKNT25.<br>Fragment MP191-MP192 amplified in:<br>- empty pKNT25 plasmid: 176bp<br>- pKNT25+HD1:1694bp<br>- pKNT25+HD2:1412bp                                                                                                                                                                                                       |
| MP192 - ACCAGCCTGATGCGATTGC                    |                                                                                                                                                                                                                                                                                                                                                                                                                     |
| MP193 - TGGCACGACAGGTTTCCC                     |                                                                                                                                                                                                                                                                                                                                                                                                                     |
| MP194 - ACAAGTCGATGCGTTCCG                     | Allow the amplification and sequencing of the constructions performed in plasmid pUT18.<br>Fragment MP193-MP194 amplified in:<br>- empty pUT18 plasmid: 284 bp<br>- pUT18+HD1: 1802 bp<br>- pUT18+HD2: 1520 bp                                                                                                                                                                                                      |
