# Supplementary material for: Genetic Dissection of Sexual Reproduction in a Primary Homothallic Basidiomycete
Source: PubMed Central journal article supplement (PMC4915694; doi:10.1371/journal.pgen.1006110), 2016-06-21
Supplement: pgen.1006110.s019.pdf [file pgen.1006110.s019.pdf]

**S12 Table.** Accession numbers for all sequences obtained and used in this work.

| Strain                                           | Gene Sequence    | Accession number / Scaffold (coordinates) |
|--------------------------------------------------|------------------|-------------------------------------------|
| <i>Phaffia rhodozyma</i> KBP 2604                | STE3-1 (partial) | KU315740                                  |
| <i>Phaffia rhodozyma</i> ATCC 24261              | STE3-1 (partial) | KU315745                                  |
| <i>Phaffia rhodozyma</i> NRRL Y-17434            | STE3-1 (partial) | KU315746                                  |
| <i>Phaffia rhodozyma</i> GY13L04                 | STE3-1 (partial) | KU315744                                  |
| <i>Phaffia rhodozyma</i> CRUB 1151               | STE3-1 (partial) | KU315742                                  |
| <i>Phaffia rhodozyma</i> CRUB 0853               | STE3-1 (partial) | KU315743                                  |
| <i>Phaffia rhodozyma</i> CRUB 1490               | STE3-1 (partial) | KU315741                                  |
| <i>Phaffia rhodozyma</i> ATCC 24229              | STE3-1 (partial) | KU315749                                  |
| <i>Phaffia rhodozyma</i> ATCC 24201              | STE3-1 (partial) | KU315750                                  |
| <i>Phaffia rhodozyma</i> ZP 922                  | STE3-1 (partial) | KU315747                                  |
| <i>Phaffia rhodozyma</i> ZP 869                  | STE3-1 (partial) | KU315748                                  |
| <i>Phaffia rhodozyma</i> CBS 6938                | STE3-1           | CED85384.1                                |
| <i>Phaffia rhodozyma</i> CBS 7918                | STE3-1           | PRJNA306035/LSVH01000226.1 (11858..13318) |
| <i>Phaffia rhodozyma</i> CRUB 1149               | STE3-1           | PRJNA307837/ NODE_186 (11928..13388)      |
| <i>Phaffia rhodozyma</i> KBP 2604                | STE3-2 (partial) | KU315756                                  |
| <i>Phaffia rhodozyma</i> ATCC 24261              | STE3-2 (partial) | KU315759                                  |
| <i>Phaffia rhodozyma</i> NRRL Y-17434            | STE3-2 (partial) | KU315754                                  |
| <i>Phaffia rhodozyma</i> GY13L04                 | STE3-2 (partial) | KU315753                                  |
| <i>Phaffia rhodozyma</i> CRUB 1151               | STE3-2 (partial) | KU315755                                  |
| <i>Phaffia rhodozyma</i> CRUB 0853               | STE3-2 (partial) | KU315757                                  |
| <i>Phaffia rhodozyma</i> CRUB 1490               | STE3-2 (partial) | KU315760                                  |
| <i>Phaffia rhodozyma</i> ATCC 24229              | STE3-2 (partial) | KU315758                                  |
| <i>Phaffia rhodozyma</i> ATCC 24201              | STE3-2 (partial) | KU315761                                  |
| <i>Phaffia rhodozyma</i> ZP 922                  | STE3-2 (partial) | KU315752                                  |
| <i>Phaffia rhodozyma</i> ZP 869                  | STE3-2 (partial) | KU315751                                  |
| <i>Phaffia rhodozyma</i> CBS 6938                | STE3-2           | CED85379.1                                |
| <i>Phaffia rhodozyma</i> CBS 7918                | STE3-2           | PRJNA306035/LSVH01000253.1 (7004..8395)   |
| <i>Phaffia rhodozyma</i> CRUB 1149               | STE3-2           | PRJNA307837/ NODE_198( 2416..3807)        |
| <i>Phaffia rhodozyma</i> KBP 2604                | HD1 (partial)    | KU315766                                  |
| <i>Phaffia rhodozyma</i> ATCC 24261              | HD1 (partial)    | KU315764                                  |
| <i>Phaffia rhodozyma</i> NRRL Y-17434            | HD1 (partial)    | KU315767                                  |
| <i>Phaffia rhodozyma</i> ZP 922                  | HD1              | KU315769                                  |
| <i>Phaffia rhodozyma</i> ZP 869                  | HD1              | KU315768                                  |
| <i>Phaffia rhodozyma</i> GY13L04                 | HD1              | KU315765                                  |
| <i>Phaffia rhodozyma</i> CRUB 1151               | HD1              | KU315770                                  |
| <i>Phaffia rhodozyma</i> ATCC 24229              | HD1              | KU315763                                  |
| <i>Phaffia rhodozyma</i> ATCC 24201              | HD1              | KU315762                                  |
| <i>Phaffia rhodozyma</i> CBS 6938                | HD1              | CDZ96688.1                                |
| <i>Phaffia rhodozyma</i> CBS 7918                | HD1              | PRJNA306035/LSVH01000060.1 (57836..59696) |
| <i>Phaffia rhodozyma</i> CRUB 1149               | HD1              | PRJNA307837/ NODE_63 (58233..58452)       |
| <i>Phaffia rhodozyma</i> ZP 922                  | HD2              | KU315773                                  |
| <i>Phaffia rhodozyma</i> ZP 869                  | HD2              | KU315772                                  |
| <i>Phaffia rhodozyma</i> GY13L04                 | HD2              | KU315775                                  |
| <i>Phaffia rhodozyma</i> CRUB 1490               | HD2              | KU315780                                  |
| <i>Phaffia rhodozyma</i> CRUB 0853               | HD2              | KU315779                                  |
| <i>Phaffia rhodozyma</i> ATCC 24229              | HD2              | KU315778                                  |
| <i>Phaffia rhodozyma</i> ATCC 24201              | HD2              | KU315777                                  |
| <i>Phaffia rhodozyma</i> KBP 2604                | HD2              | KU315776                                  |
| <i>Phaffia rhodozyma</i> ATCC 24261              | HD2              | KU315771                                  |
| <i>Phaffia rhodozyma</i> NRRL Y-17434            | HD2              | KU315774                                  |
| <i>Phaffia rhodozyma</i> CBS 6938                | HD2              | CDZ96689.1                                |
| <i>Phaffia rhodozyma</i> CBS 7918                | HD2              | PRJNA306035/LSVH01000060.1 (55622..57058) |
| <i>Phaffia rhodozyma</i> CRUB 1149               | HD2              | PRJNA307837/ NODE_63 (55665..56306)       |
| <i>C. neoformans</i> var <i>neoformans</i> JEC21 | STE3             | XP_570116.1                               |
| <i>C. neoformans</i> var <i>neoformans</i> JEC20 | STE3             | AAN75624.1                                |
| <i>C. neoformans</i> var <i>grubii</i> H99       | STE3             | XP_012049557.1                            |
| <i>C. neoformans</i> var <i>grubii</i> 125.91    | STE3             | AAN75156.1                                |
| <i>C. gattii</i> WM276                           | STE3             | XP_003196044.1                            |
| <i>C. gattii</i> E566                            | STE3             | AAV28758.1                                |
| <i>C. flavescens</i> CF05-CBS8359                | STE3             | CDR19326.1                                |
| <i>C. flavescens</i> CF01-CBS4918                | STE3             | CDR19282.1                                |
| <i>K. magrovensis</i> CBS8507                    | STE3             | CCM73226.1                                |
| <i>K. magrovensis</i> CBS10435                   | STE3             | ASQD01000019.1                            |
| <i>K. heveanensis</i> CBS569                     | STE3             | ACZ81463.1                                |
| <i>K. heveanensis</i> BCC8398                    | STE3             | ASQB01000005                              |
| <i>Dioszegia cryoxerica</i>                      | STE3             | ANT03-071JGI-262391                       |
| <i>Dioszegia cryoxerica</i>                      | STE3             | ANT03-071JGI-351885                       |
| <i>Tremella fuciformis</i> tr26                  | STE3             | LBGW01000351                              |
| <i>T. mesenterica</i> ATCC24925                  | STE3             | ADO17672.1                                |
| <i>Sporidiobolus salmonicolor</i> CBS490         | STE3             | ADM24775.1                                |
| <i>Sporidiobolus salmonicolor</i> CBS483         | STE3             | ADM24772.1                                |
| <i>Leucosporidium scottii</i> CBS5931            | STE3             | CRX79175.1                                |
| <i>Leucosporidium scottii</i> CBS5930            | STE3             | CRX79175.1                                |
| <i>Saccharomyces cerevisiae</i> S288c            | STE3             | NP_012743.1                               |
| <i>Phaffia rhodozyma</i> CBS 7918                | MFA1             | PRJNA306035/LSVH01000226 (14268..14399)   |
| <i>Phaffia rhodozyma</i> CBS 6938                | MFA1             | PRJEB6925/LN483332.1 (1417935..1418060)   |
| <i>Phaffia rhodozyma</i> CBS 7918                | MFA2             | PRJNA306035/LSVH01000253 (9521..9646)     |
| <i>Phaffia rhodozyma</i> CBS 6938                | MFA2             | PRJEB6925/LN483332.1 (1423341..1423472)   |
