# Supplementary material for: Genetic Dissection of Sexual Reproduction in a Primary Homothallic Basidiomycete
Source: PubMed Central journal article supplement (PMC4915694; doi:10.1371/journal.pgen.1006110), 2016-06-21
Supplement: pgen.1006110.s020.pdf [file pgen.1006110.s020.pdf]

## S1 File. Sequence of Synthetic HD1 and HD2 genes

### HD1 (cloned into *Eurofins in-house standard vector pEX-K4-HD1*)

ATGGAACCGAGTCCGGCGAGTGACCTGTCAGCGCGTCTTGACAGTCTCGTGGAAACGTTCTGATCAGCATTCCG  
CGGGAGTCCGATCGAATTATCCCAGATCTACGATGCGTTCCGCCGAAGAACGCTGCAAAGCGCGTTCTCAAGGA  
CTGCTGACCTTCGCCTTTCAGGAAGAAATCTCCGCTTCAGTTGGCTTTCTCTCGACTCTCGCCTCGTGCATGATGAA  
TATCCGGAAGGCAACAAAGACTTTTCAGACCACCGTCATTGGCATCTTAAACAATGCAAACAATACGCCAGAGCTGT  
GTCTAGCCGCAACTTAGTTTTCCCTCCGAAAGATTCTGGCATCGAAAGCGGATTTCGGGCCGCTCGATGCGTCCAC  
GCACAGAGCATCCCTCTTGGTTTCGGCATCTGCGCGATTGGTTTCATTGTGCATCTGGATCATCCGTATCCTTCTGC  
**TCAGGAGAAAGAGGAGCTTGCTCTGGCACGTAACCTGACCAAGAAGCTCGATCAACCTGTGGTTCAATAATATGC**  
**GTCGTCGACGGCTGGATGG**ATTTCGTACGCACACACGCGTTGAACAATCAGACCCGCATGAAAGAAGTGGTGT  
TGCTTACCCTGCTCTGCCTGCCGTTGAACGTTACATCCGGACCTTCCGTTTGAGCTGCGGCAGCAGCTCGATC  
GCATTCCGATCATGTGGATGAGAAAGTGCATGATCGCGTGCCTGATTGGATGACAGGTGCACTGGACTACAAAG  
ACGGTTTTGGGTCCCGCCGAAGGAATTGGCCGTAGCCCGAAAAGAAGAACGAAGTCAACAAAGATACCGCGA  
AAAGCGTTCCAGTCCATCTTGTACAAACAAGCCTTTACTGCGAAAGATGCACAGCCGTGGCTGACCAGTTACCC  
CACCGCCGTAGCGGCTTGATTGGCTATCCGAGTTCAATCCCGCTGGCGAATTGTCCGACGCCGAAAAGTAGCAA  
ACGGCTGTTTTCGGATTGTGGTCCGCACCTAGCTGCACCGATTGACCCGGTCAACAAATACCACCAGTTAATTAAC  
CTCAGCTCAGTCTACCCAGGATCTGGAGGGTCTTTGCTGACTCACCAACCATTGAGCGCGTATGCTTACTATC  
CTACTCATCCGAATCCAGAAATCCGTTACCAATGCTGGTCCACACCGTATCGTTCAAGCAGCGATTTCGAGTA  
TCCAGCCTATGACCTGAAAGCACCGATTTCGCGCGCAAACCTGGCTGCCGTTGACCCTGCGATTGATCCGTCAAAT  
GGGCCAAACATTCACCAACGTAGCGTTTCCCATACCAAGCCGTGCGAAAAGCACGGTATCCTCTCTGGCAACGA  
GTACCACGCTCCAAAGCACGCGCTTTCTGTGAATGAAAGTCCCGTAATGAACTGGCGGCCAAACTGGAAGCCC  
TTCGCATCAAGAAAGAAGCGCTGAAGAAAGAGAAAGAAGCAGTTGCGCGCCGAAGCTGAAGCACTGGCGGAAGTAT  
TCGACTGCTAA

### HD2 (cloned into *Eurofins in-house standard vector pEX-K4-HD2*)

ATGTATAGCTTACCAAGTTGCCGCAGAAATACACTGGTTTAGGAGATGTCTTTGATTCTAACATTGACAGTTGAG  
CAGCAAAGAGTTTGCTCTCGAAGATCTGTATCTGCCAATCCCGACGTCCATTTCGCGAGACTTTGGAGGAACTGGGT  
ACGCCGCATACCCTGGCCCGCAATTTAGGCGCCCTGTACCTGAGTCGTGCGATGGCCGCTGCGCGAACTGAGTTTA  
TCGCAGTTTGACACCGCATTCCCTGCCGAACGCACGTTTCTCTTGAAGCCAACCTCCCTCAAAGTAAAGTGTAA  
AGGCCTGCTTAAAGCGACTCTGGAATAACGCTACAGCATGGAAGTGTTCACCATCAGGAAACCATTCAGCTG  
GCCGGTGTCTGGACCTCAGACGATGAACAAGCACAGTATCCGTACGCCGTAGCTCATTACGAAGAATACGAT  
**TGACACCCTCCAAGCCCTGTATGACCTGAACCAATATCCGAACCCGATTGAGCTGAAAACCATTGCAGTTAAAGT**  
**GGGCTTACAGCCGAAACAGATTTCGTTGGTTTCAGAATCGCCGTAATCGGCGCTCTAGCCCGCACGGTCCC**  
ATAAGAAACCCCTTAAATCTCTACCCGTGCTACTGTTGCGAGTGACCTGAAGTTCAACAGCGTCCGCAAACGTTGT  
TCGCGCCGTACTACAAGCATCGAAAAGGAGCGCAAACCGAGGGTGTGCCGTACAACTGGGCTCACCGATCTTC  
TTGCAGACCAACAAAACCCATACGTTTCTCAGTCGGAAGGCCGCTCTCGCGTTGGTAATTCGTTAGTGGCAGGAC  
TGTTGATACATCGCCCAACGAACAGGATGCGTATGCGCTTTGGAGTGCCGTTGTGAGCGATCGTAGTGCAGCATA  
TGCGAACAGTAAGCATGTGCCTCAGATCGAACCATCTGCGCTTTGCCATTCCGGAACCGCGGATAGCATGTC  
CGCGCAACGTTCCGAGAATCACTTCAATTCCTGCTCGAAATCGTCCAGTAGCCATCCGGCGTTTCTCCGGTGT  
GGGTCTAGCGAAACGATGGAAGTGCATCCGGTAGATTGGACCATGGTTTTGCGCGCTTCACTCTCGCAATATTG  
CACCACGTAGCGAGAAACCGTACGCTCGCTGGGAAACGAAAACAGGCCTTGAAGTCAAGATGCCATGCTGGATG  
TGAACCTGAACATGACAACGGGAAATAA

Note:

Underlined sequence: N-terminal region

**Bold sequence**: Homeodomain region
